# Supplementary material for: Prognostic Model of ICU Admission Risk in Patients with COVID-19 Infection Using Machine Learning
Source: MDPI journal article supplement (doi:10.3390/diagnostics12092144), 2022-09-03
Supplement: s1 [file s1]

## Supplementary Materials

**Supplementary Table S1:** Performance comparison between different ML classifiers using all (both COVID-19 and non-COVID-19) patients' data with LOOCV

| Classifier                          | Overall            | Weighted with 95% CI |                    |                     |                     |
|-------------------------------------|--------------------|----------------------|--------------------|---------------------|---------------------|
|                                     | Accuracy           | Precision            | Sensitivity        | Specificity         | F1-score            |
| Support Vector Machine (SVM)        | 81.43 ± 1.59       | 81.69 ± 1.58         | 81.43 ± 1.59       | 81.09 ± 1.6         | 81.51 ± 1.58        |
| XGBoost (XGB)                       | 79.26 ± 1.65       | 80.47 ± 1.62         | 79.26 ± 1.65       | 80.39 ± 1.62        | 79.39 ± 1.65        |
| MLP                                 | 80.13 ± 1.63       | 80.03 ± 1.63         | 80.13 ± 1.63       | 78.68 ± 1.67        | 80.07 ± 1.63        |
| Logistic Regression (LR)            | 81.43 ± 1.59       | 81.8 ± 1.57          | 81.43 ± 1.59       | 81.33 ± 1.59        | 81.53 ± 1.58        |
| K-Nearest Neighbors (KNN)           | 78.4 ± 1.68        | 80.91 ± 1.6          | 78.4 ± 1.68        | 80.91 ± 1.6         | 78.4 ± 1.68         |
| Extra Tree (ET)                     | 79.26 ± 1.65       | 79.58 ± 1.64         | 79.26 ± 1.65       | 78.97 ± 1.66        | 79.36 ± 1.65        |
| Gradient Boosting (GB)              | 80.56 ± 1.61       | 80.45 ± 1.62         | 80.56 ± 1.61       | 79.01 ± 1.66        | 80.48 ± 1.62        |
| Random Forest (RF)                  | 81 ± 1.6           | 80.91 ± 1.6          | 80.99 ± 1.6        | 79.58 ± 1.64        | 80.94 ± 1.6         |
| <b>Stacking model (RF+ LR+ SVM)</b> | <b>83.4 ± 1.55</b> | <b>83.97 ± 1.5</b>   | <b>83.4 ± 1.55</b> | <b>81.33 ± 1.74</b> | <b>83.62 ± 1.63</b> |

**Supplementary Table S2:** Performance comparison between different ML classifiers using only COVID-19 patient data with LOOCV

| Classifier                          | Overall            | Weighted with 95% CI |                     |                     |                     |
|-------------------------------------|--------------------|----------------------|---------------------|---------------------|---------------------|
|                                     | Accuracy           | Precision            | Sensitivity         | Specificity         | F1-score            |
| XGBoost (XGB)                       | 79.97 ± 1.99       | 79.78 ± 1.99         | 79.97 ± 1.99        | 78.08 ± 2.05        | 79.83 ± 1.99        |
| Support Vector Machine (SVM)        | 83.43 ± 1.85       | 83.69 ± 1.83         | 83.43 ± 1.85        | 83.09 ± 1.86        | 83.51 ± 1.84        |
| MLP                                 | 81.26 ± 1.94       | 82.47 ± 1.89         | 81.26 ± 1.94        | 82.39 ± 1.89        | 81.39 ± 1.93        |
| Gradient Boosting (GB)              | 82.13 ± 1.9        | 82.03 ± 1.91         | 82.13 ± 1.9         | 80.68 ± 1.96        | 82.07 ± 1.9         |
| Logistic Regression (LR)            | 83.43 ± 1.85       | 83.8 ± 1.83          | 83.43 ± 1.85        | 83.33 ± 1.85        | 83.53 ± 1.84        |
| K-Nearest Neighbors (KNN)           | 80.4 ± 1.97        | 82.91 ± 1.87         | 80.4 ± 1.97         | 82.91 ± 1.87        | 80.4 ± 1.97         |
| Extra Tree (ET)                     | 81.26 ± 1.94       | 81.58 ± 1.92         | 81.26 ± 1.94        | 80.97 ± 1.95        | 81.36 ± 1.93        |
| Random Forest (RF)                  | 82.56 ± 1.88       | 82.45 ± 1.89         | 82.56 ± 1.88        | 81.01 ± 1.95        | 82.48 ± 1.89        |
| <b>Stacking model (RF+ LR+ SVM)</b> | <b>84.1 ± 1.81</b> | <b>84.01 ± 1.82</b>  | <b>84.09 ± 1.82</b> | <b>82.68 ± 1.88</b> | <b>84.04 ± 1.82</b> |
